# Supplementary material for: Topological transformations of isotropic droplets with breakup and formation of topological defects in a confined nematic geometry
Source: Royal Society of Chemistry journal article supplement (doi:10.1039/d5sm00345h), 2025-01-01
Supplement: d5sm00345h1.pdf [file d5sm00345h1.pdf]

## Electronic Supplementary Information

### Topological transformations of isotropic droplets with breakup and formation of topological defects in a confined nematic geometry

P. V. Dolganov<sup>1,2</sup>, N. A. Spiridenko<sup>1</sup> and V. K. Dolganov<sup>1</sup>

<sup>1</sup>*Osipyan Institute of Solid State Physics RAS, Chernogolovka,  
Moscow Region, 142432 Russia*

<sup>2</sup>*National Research University Higher School of Economics, Moscow,  
101000 Russia*

(a) Sessile isotropic droplet with pocket (pit) and one topological defect

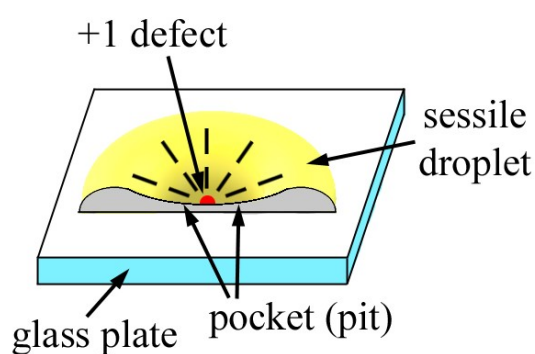

(b) Sessile isotropic droplet with pocket (pit) and three topological defects

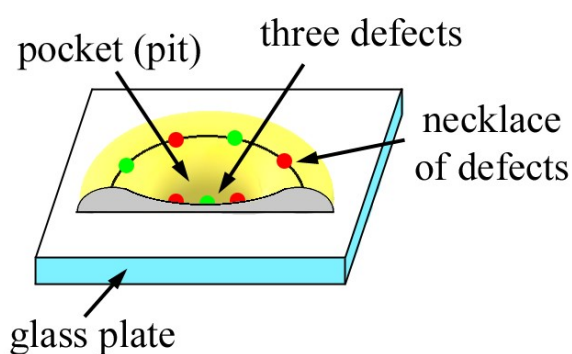

Fig. S-1

Schematic representation of sessile isotropic droplet with a pocket in nematic environment. (a) A droplet with  $s=+1$  defect (red dot),  $\chi=S=+1$ . Lines show the projection of the nematic director on the nematic-isotropic interface. (b) A droplet with three defects in the central part: two  $+1$  defects (red dots) and one  $-1$  defect (green dot) and with a circular chain of defects (necklace).

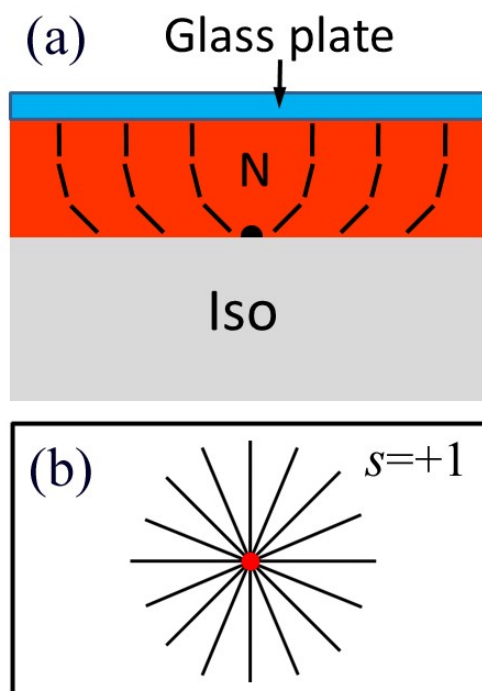

Fig. S-2

Point topological defect in nematic layer with hybrid director orientation. The director anchoring is homeotropic at the solid surface and oblique at the nematic-isotropic interface. (a) Side view of director distribution in the center of nematic pocket. The nematic phase is shown by red and the isotropic phase by light grey. (b) Top view of the projection of director on the nematic-isotropic interface near a topological defect with  $s=+1$ .

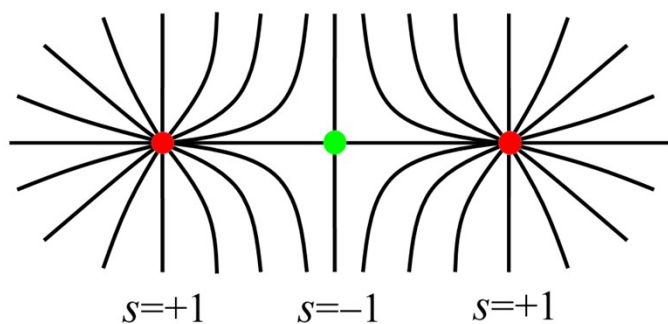

Fig. S-3

Schematic representation of director field in the vicinity of two  $s=+1$  and one  $s=-1$  topological defects.
